# Supplementary material for: Participation of interfacial hydroxyl groups in the water-gas shift reaction over Au/MgO catalysts
Source: Royal Society of Chemistry journal article supplement (doi:10.1039/c7cy01020f), 2017-01-01
Supplement: c7cy01020f1.pdf [file c7cy01020f1.pdf]

## Supporting Information for

### Participation of Interfacial Hydroxyl Groups in the Water-Gas Shift

#### Reaction over Au/MgO Catalysts

Yanran Cui<sup>a,§</sup>, Zhenglong Li<sup>a,b,§</sup>, Zhijian Zhao<sup>a</sup>, Viktor J. Cybulskis<sup>a</sup>, Kaiwalya D. Sabnis<sup>a</sup>, Chang Wan Han<sup>c</sup>, Volkan Ortalan<sup>c</sup>, William F. Schneider<sup>d</sup>, Jeffrey Greeley<sup>a</sup>, W. Nicholas Delgass<sup>a,§§</sup> and Fabio H. Ribeiro<sup>a,§§</sup>

<sup>a</sup>Charles D. Davidson School of Chemical Engineering, Purdue University, West Lafayette, IN 47907(USA)

<sup>b</sup>Energy and Transportation Sciences Division, Oak Ridge National Laboratory, Oak Ridge, TN 37831 (USA)

<sup>c</sup>School of Materials Engineering, Purdue University, West Lafayette, IN 47907(USA)

<sup>d</sup>Department of Chemical and Biomolecular Engineering, University of Notre Dame, Notre Dame, IN 46556 (USA)

<sup>§</sup> Co-first authors, <sup>§§</sup> Co-corresponding authors

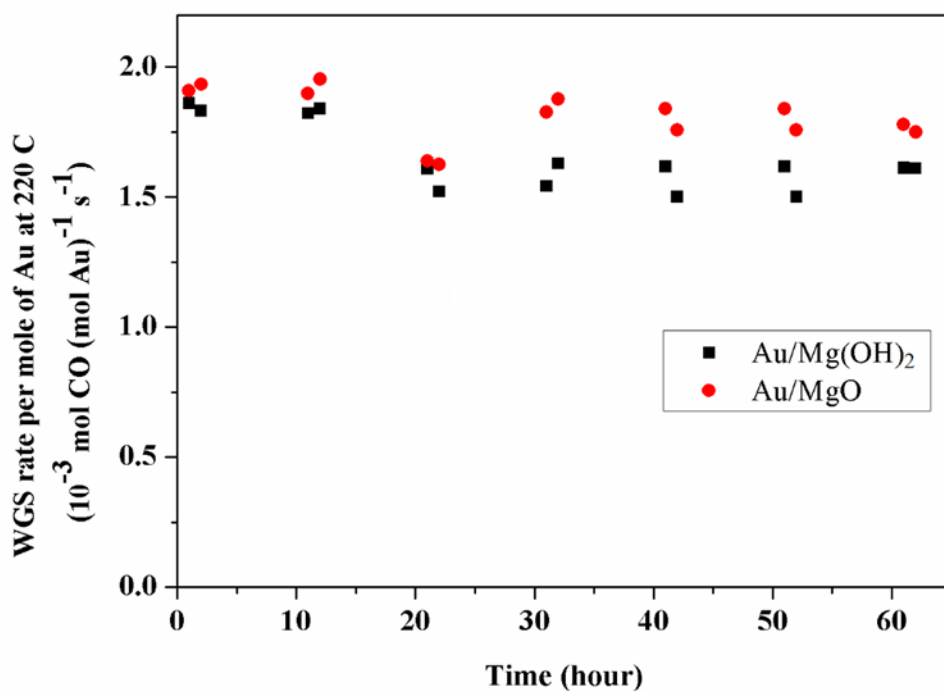

Figure S1. Deactivation plot during the measurement of WGS kinetics (standard conditions, 6.8% CO, 21.9% H<sub>2</sub>O, 8.5% CO<sub>2</sub>, 37.4% H<sub>2</sub>, and balance Ar).

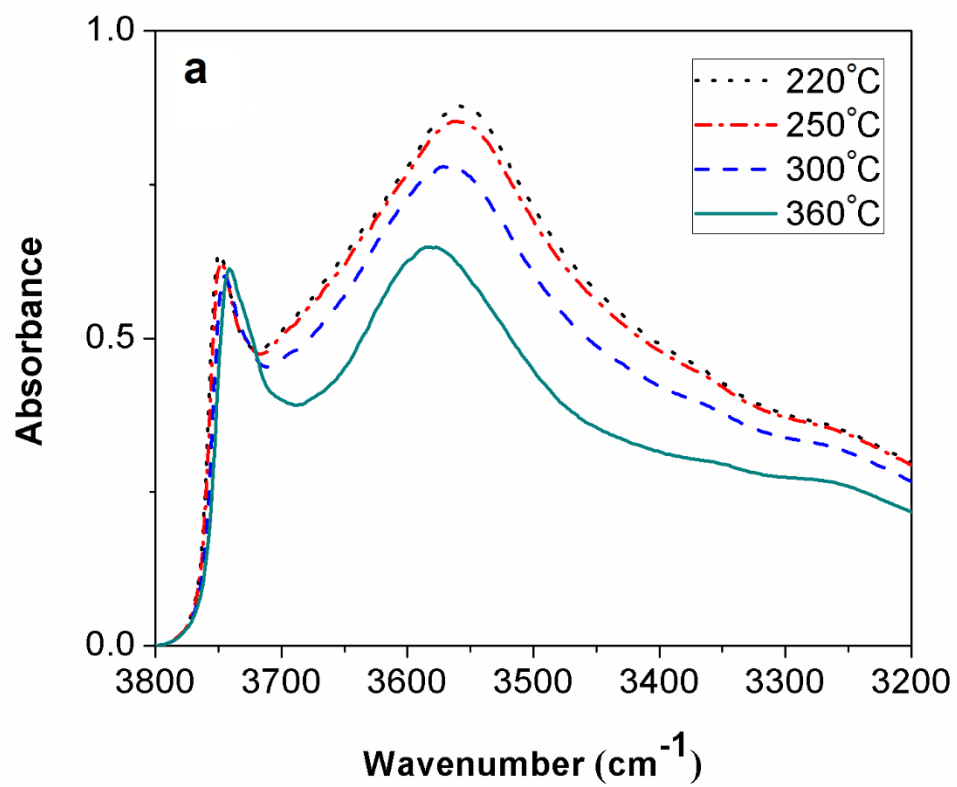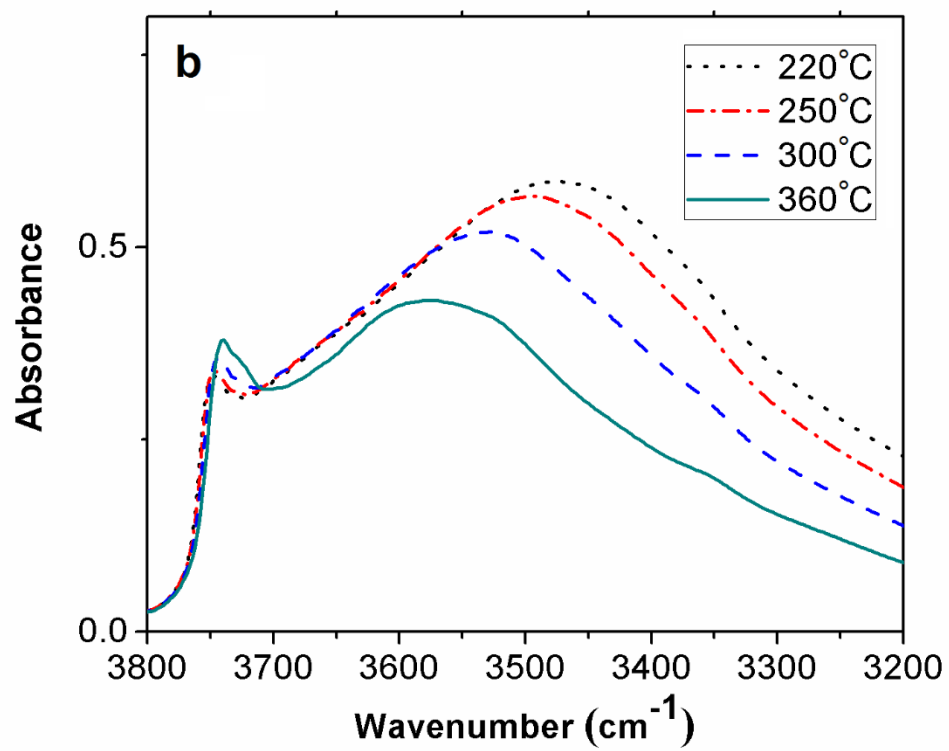

Figure S2. N<sub>2</sub> TPD (ramp rate: 5 °C min<sup>-1</sup>) after exposure to 11% H<sub>2</sub>O/N<sub>2</sub>: a) Au/MgO b) MgO Support. Both samples were pretreated by reduction in 25% H<sub>2</sub>/N<sub>2</sub> at 150 °C for 2 hours (flow rate: 50 ml min<sup>-1</sup>, ramp rate: 2 °C min<sup>-1</sup>) followed by annealing in N<sub>2</sub> at 400 °C for 2 hours (flow rate: 50 ml min<sup>-1</sup>, ramp rate: 5 °C min<sup>-1</sup>).

Table S1. Simulated relative WGS rates by manually tuned (D-OD)\*# binding energy

| $\Delta BE^a$ / eV | 0    | +0.02 | +0.03 | +0.04 |
|--------------------|------|-------|-------|-------|
| $r_H/r_D$          | 1.02 | 1.42  | 1.77  | 2.22  |

<sup>a</sup>: Manually tuned (D-OD)\*# binding energy (eV). Positive number indicates weakening (D-OD)\*# binding strength.
